# Supplementary material for: Plasma Carboxyl-Metabolome Is Associated with Average Daily Gain Divergence in Beef Steers
Source: Animals (Basel). 2021 Jan 1;11(1):67. doi: 10.3390/ani11010067 (PMC7824440; doi:10.3390/ani11010067)
Supplement: Supplementary file 1 [file animals-11-00067-s001.xlsx]

## Sheet: Sheet1
Table S1: List and relative concentrations of identified metabolites
	1	2	3	4	5	6	7	8	9	10	11	12	13	14	15
(10S)-Juvenile hormone III acid diol	0.256	0.424	0.783	1.26	1.755	0.873	1.354	0.921	1.751	1.573	0.447	0.39	1.438	0.669	1.031
Docosahexaenoic acid	0.662	0.88	1.764	1.558	1.224	1.604	1.721	2.188	0.508	0.769	0.632	2.115	1.151	1.747	0.907
6-Hydroxy-5-isopropenyl-2-methylhexanoate	0.912	0.908	0.978	1.244	1.141	0.942	0.862	0.914	0.859	0.938	0.688	0.964	0.823	1.101	0.826
Docosapentaenoic acid	0.488	0.692	1.705	1.477	1.281	1.723	1.465	2.1	0.397	0.664	0.525	2.405	1.216	2.18	1.042
10-Hydroperoxy-8,12-octadecadienoate	0.263	0.504	1.132	1.359	1.584	1.405	1.383	1.474	1.102	0.86	0.556	2.58	1.406	1.483	0.92
Eicosatrienoic acid	0.856	0.838	1.788	1.956	1.212	1.506	1.689	2.228	0.535	0.558	0.568	1.77	1.063	1.894	0.968
Hexadecenoic acid	0.794	0.692	1.667	2.725	1.093	1.84	1.355	3.189	0.347	0.573	0.472	2.032	1.212	2.678	0.765
13-Hydroperoxyoctadeca-9,11-dienoic acid	0.347	0.683	1.077	1.275	1.558	1.486	1.473	1.456	1.061	0.927	0.556	2.566	1.43	1.356	0.817
Octadecatrienoic acid	0.808	0.843	1.694	2.105	1.153	1.662	1.376	2.369	0.42	0.658	0.581	1.747	0.995	2.254	0.876
(S)-1-Pyrroline-5-carboxylate/1-Pyrroline-5-carboxylic acid	1.525	1.539	0.754	0.317	NA	0.711	1.19	0.439	0.972	0.892	1.204	0.827	0.743	0.712	0.961
(S)-2,3,4,5-Tetrahydropyridine-2-carboxylate	0.83	1.157	1.019	1.328	0.807	1.253	0.986	1.165	0.861	1.192	1.115	1.1	1.134	1.189	0.91
(S)-3-Hydroxyisobutyrate	0.889	1.084	0.93	0.821	1.022	0.887	1.043	0.895	1.086	1.16	0.962	0.664	1.059	0.833	1.165
10,16-Dihydroxyhexadecanoic acid	0.616	1.224	1.185	1.232	1.462	1.551	1.101	1.375	1.208	0.779	0.784	1.506	0.918	0.875	0.954
11H-14,15-EETA	0.673	1.532	0.846	1.09	1.9	0.79	1.278	1.383	1.628	1.611	1.164	0.74	1.567	0.804	1.427
12(13)-EpOME	0.887	1.119	1.289	1.929	1.486	1.623	1.534	1.871	1.285	0.946	0.816	2.054	1.273	1.483	1.043
12(R)-HPETE/12(S)-HPETE	0.533	0.806	1.255	1.69	1.31	1.716	1.285	1.841	0.97	0.803	0.617	1.956	1.536	1.457	0.905
12-Hydroxydodecanoic acid	0.639	1.127	0.977	2.78	1.254	1.907	1.433	1.232	0.974	0.742	0.704	1.653	1.42	1.286	0.709
12-Keto-leukotriene B4	0.421	0.395	1.439	1.676	8.005	1.158	1.102	3.433	1.863	0.767	0.719	2.005	2.427	3.185	0.998
12-Oxo-9(Z)-dodecenoic acid	0.997	0.676	1.368	1.488	1.477	1.37	0.728	1.065	1.002	0.636	1.016	3.274	1.073	1.207	0.709
13(S)-HODE	1.441	1.68	1.538	1.975	2.404	1.701	1.758	1.457	1.968	1.398	1.023	1.544	1.655	1.499	1.278
13-OxoODE	0.702	0.822	1.376	2.806	1.153	1.686	1.326	2.17	0.649	0.639	0.473	2.234	1.224	1.507	0.792
14,15-EET	0.769	1.317	1.206	1.607	1.778	1.221	1.48	1.288	1.686	1.048	1.057	1.507	1.867	1.38	1.065
15-Deoxy-Delta12,14-PGJ2	0.657	0.778	0.89	1.018	1.311	0.91	0.934	0.958	0.97	0.93	0.658	0.807	0.868	1.204	1.154
15H-11,12-EETA	0.558	1.235	0.848	1.233	1.679	0.947	1.181	1.07	1.292	1.096	1.003	1.673	1.346	0.949	1.144
16-Hydroxypalmitate	0.672	0.876	1.216	3.752	1.066	1.504	1.415	2.271	0.598	0.772	0.442	2.592	1.263	1.393	0.758
16-Oxopalmitate	0.81	0.882	1.162	3.521	1.264	1.419	1.336	1.971	0.802	0.712	0.512	1.782	0.977	1.452	0.771
18-Hydroxyoleate	0.615	1.155	1.796	3.334	1.124	1.525	1.315	2.157	0.661	0.736	0.356	1.687	1.395	1.564	0.965
18-Oxooleate	0.868	0.829	1.119	2.031	0.991	1.386	1.169	1.745	0.67	0.853	0.826	1.881	0.936	1.359	0.727
1-Aminocyclopropane-1-carboxylate	0.63	1.14	0.702	1.189	0.766	0.859	0.889	0.858	1.103	1.023	0.669	1.21	1.049	0.974	0.973
1-Deoxy-11-oxopentalenate	1.423	1.221	1.134	1.071	2.158	0.627	1.474	0.927	1.249	1.63	1.067	0.82	0.829	1.175	1.242
1-Deoxypentalenate	0.45	0.757	0.836	1.104	0.898	0.612	0.751	0.723	0.63	0.736	0.618	0.834	0.723	0.708	0.701
1-Pyrroline-2-carboxylate	1.067	1.249	0.738	1.102	0.864	0.936	0.946	0.902	1.178	1.146	1.383	1.063	1.107	0.945	1.009
1-Pyrroline-4-hydroxy-2-carboxylate	0.583	0.757	1.173	1.386	1.748	1.313	1.233	1.05	1.611	0.931	0.727	0.688	1.516	1.012	1.28
2,3,4,5-Tetrahydrodipicolinate - 2 tags	1.236	1.499	1.01	0.53	0.913	0.59	1.185	0.753	0.571	0.79	1.421	1.075	0.387	1.145	1.987
2,3-Dihydrothienamycin	0.741	1.108	0.775	1.051	NA	0.655	0.881	NA	1.258	1.092	1.068	NA	0.869	0.616	0.857
2-[(2-Aminoethylcarbamoyl)methyl]-2-hydroxybutanedioate	0.969	0.754	0.561	0.693	1.348	0.677	0.66	0.331	1.067	0.486	0.933	0.393	0.795	0.577	0.833
2-[(2-Aminoethylcarbamoyl)methyl]-2-hydroxybutanedioate - 2 tags	1.115	1.071	0.588	0.762	0.898	0.752	0.598	0.567	0.832	0.701	1.245	0.541	0.659	0.581	0.92
2-Benzylmalic acid	1.479	0.922	0.83	0.414	0.798	0.637	0.59	0.262	1.418	1.131	1.395	0.555	0.626	0.442	0.539
2-Chlorobenzoate	1.276	1.318	1.111	1.048	0.897	1.312	0.925	1.145	0.691	1.01	1.345	1.2	1.035	1.041	0.954
2-Dehydro-3-deoxy-D-gluconate/2-Dehydro-3-deoxy-D-galactonate/2-Dehydro-3-deoxy-L-galactonate	0.326	0.234	0.267	0.293	0.528	0.219	0.331	0.196	0.559	0.099	0.26	0.192	0.256	0.239	0.403
2-Formaminobenzoylacetate	1.492	1.423	2.139	1.267	1.358	1.379	1.224	2.001	1.048	1.034	1.613	1.945	2.399	1.542	1.997
2-Hydroxymuconate	1.227	1.225	0.553	1.464	1.014	1.008	0.856	1.515	1.535	1.356	0.981	0.061	1.125	0.535	0.868
2-Naphtylmethylsuccinic acid	0.915	0.944	0.985	0.873	1.704	0.648	0.891	0.919	1.092	0.848	0.784	0.472	1.071	0.704	1.098
2-Naphtylmethylsuccinic acid - 2 tags	1.144	0.972	1.182	0.615	1.196	0.673	1.235	1.263	0.468	0.657	1.252	0.375	1.055	0.915	2.067
2-Oxo-6-methylthiohexanoic acid	0.433	1.179	1.109	0.882	0.955	0.886	0.758	1.02	0.695	1.303	0.697	1.071	0.975	1.153	1.307
2-Propylmalate	0.838	1.055	0.799	0.714	1.003	0.816	0.998	0.747	1.145	0.844	0.849	0.728	0.756	0.683	1.585
3-(Methylthio)propanoate	0.966	1.405	0.92	0.787	0.9	1.035	0.999	0.642	1.361	0.579	0.908	1.347	0.822	0.62	1.069
3,4-Dihydroxymandelate	0.904	0.825	0.679	0.611	0.793	0.796	0.707	0.536	1.174	0.842	0.973	0.499	0.754	0.555	0.902
3-Hydroxyphenylacetate	1.969	1.173	0.99	0.318	1.204	0.533	0.913	0.514	0.75	0.738	1.56	0.692	0.699	0.76	1.466
3-Oxalomalate	0.704	0.736	0.765	0.903	1.612	0.964	0.758	0.722	1.098	0.721	0.752	0.741	0.962	0.723	0.94
4-(beta-D-Glucosyloxy)benzoate	1.249	2.476	1.208	3.441	1.774	1.446	1.33	0.91	1.434	2.063	1.309	2.13	1.562	1.887	1.475
4-Acetamidobutanoate	0.443	0.561	1.119	1.095	2.444	1.212	0.968	0.892	1.481	0.59	0.444	1.068	1.508	1.121	1.326
4-Chlorobenzoate	1.279	1.322	1.099	1.036	0.883	1.273	0.904	1.181	0.668	1.011	1.301	1.195	1.042	1.083	0.95
4-Chlorophenylacetate	2.097	1.322	1.425	0.382	1.272	0.777	1.105	0.737	0.504	0.786	1.535	1.096	0.681	1.031	1.832
4-Hydroxy-2-oxopentanoate	0.798	NA	1.413	1.225	1.309	1.399	1.233	0.764	1.422	1.195	1.176	1.111	1.537	1.099	1.164
4-Hydroxy-2-quinolinecarboxylic acid	1.089	1.049	1.334	1.045	1.05	0.777	0.915	1.196	1.079	1.174	0.983	1.097	0.96	1.191	0.859
4-Methylaminobutyrate	0.664	0.799	1.068	1.446	1.51	1.342	0.909	1.431	1.077	0.859	0.618	1.689	1.553	1.205	1.111
4-Methylene-L-glutamate	0.543	0.754	0.935	2.214	1.148	1.49	1.053	1.252	1.743	1.479	0.79	0.557	1.879	0.797	0.765
4-Methylene-L-glutamate - 2 tags	2.568	1.559	0.443	0.259	0.345	0.541	0.75	0.394	1.222	0.81	2.74	0.258	0.446	0.348	0.753
4-Oxoproline	0.526	0.788	0.707	0.92	1.414	0.877	1.081	0.632	1.945	0.917	0.978	0.553	1.034	0.739	1.015
5,6-DHET	0.561	1.073	1.097	1.361	1.434	1.091	1.378	1.398	1.401	0.923	1.041	1.251	1.119	1.178	1.012
5,6-Epoxytetraene	0.556	0.592	0.879	0.769	1.355	0.868	0.741	3.619	1.481	0.607	0.531	1.225	0.843	1.01	0.877
5-Acetamidopentanoate	1.594	0.389	0.684	0.404	1.747	1.369	0.869	0.651	2.165	0.779	1.014	0.497	0.636	0.876	0.768
6-Amino-2-oxohexanoate	1.12	1.073	0.946	0.923	1.679	1.188	NA	1.012	NA	0.82	1.132	1.032	NA	0.979	NA
6beta,7beta-Dihydroxykaurenoic acid	0.362	0.491	1.155	1.455	4.006	1.493	1.19	2.951	2.06	0.498	0.413	1.157	2.105	1.801	0.975
8(S)-HETE/8(R)-HETE	0.836	1.154	1.004	1.577	1.34	1.147	1.228	1.333	1.418	0.827	1.067	1.133	1.607	1.089	0.924
8-Methyl-6-nonenoic acid	0.93	0.809	1.461	1.523	0.938	1.722	0.914	1.978	0.496	0.58	0.689	3.1	0.92	1.96	0.662
9(10)-EpOME	0.703	0.786	1.228	2.187	0.941	1.463	1.305	2.041	0.582	0.609	0.54	1.757	0.892	1.387	0.675
9(S)-HODE	0.511	1.018	1.083	1.784	1.14	1.301	1.296	1.705	1.04	1.055	0.774	1.704	1.117	1.417	1.033
9(S)-HPODE	0.381	0.759	1.075	1.249	1.464	1.377	1.48	1.398	0.985	1.03	0.626	2.118	1.45	1.309	0.808
9,10,13-TriHOME	0.279	1.245	0.842	1.147	0.994	1.667	1.607	1.148	0.746	1.319	1.078	1.679	0.988	1.18	0.714
9,10,18-Trihydroxystearate	0.736	0.692	1.546	2.442	1.13	1.867	1.238	2.603	0.487	0.515	0.457	1.686	1.234	2.279	0.802
9,10-12,13-Diepoxyoctadecanoate	0.488	0.543	0.797	0.775	0.917	0.795	0.833	0.685	0.733	0.595	0.548	0.755	0.707	0.877	0.715
9,10-Dihydroxystearate	0.741	1.35	1.46	1.882	1.133	1.482	1.485	1.855	NA	1.292	NA	2.342	1.718	1.829	NA
9,10-Epoxy-18-hydroxystearate	0.645	0.585	1.436	2.095	0.976	1.612	1.183	2.09	0.634	0.43	0.426	1.745	1.175	1.809	0.727
9-cis,11-trans-Octadecadienoate	0.83	0.726	1.933	2.733	1.063	1.78	1.503	2.76	0.399	0.595	0.501	2.112	1.024	2.412	0.772
Acrylic acid	1.384	1.385	1.076	0.706	0.696	0.707	0.969	0.884	1.069	1.264	1.52	1.079	1.026	1.109	1.015
Adrenic acid	0.851	0.86	1.765	1.935	1.144	1.259	1.618	2.158	0.59	0.724	0.529	2.01	1.151	1.948	0.926
all-trans-18-Hydroxyretinoic acid	0.444	0.889	1.043	0.436	1.153	0.324	0.824	0.728	0.97	0.86	0.822	0.566	1.426	1.091	0.911
all-trans-4-Oxoretinoic acid	0.611	0.681	0.809	1.034	0.807	0.776	0.968	NA	0.544	0.598	0.764	1.016	0.818	0.557	0.708
all-trans-5,6-Epoxyretinoic acid	0.639	0.519	1.054	0.864	1.061	1.38	1.342	2.196	0.62	0.682	0.426	1.515	1.068	1.466	0.617
alpha-Phocaecholic acid	0.582	1.012	0.483	1.125	0.793	1.103	1.702	0.391	2.218	0.777	1.242	1.207	0.823	0.995	0.596
Aminomalonic acid - 2 tags	2.443	1.539	1.09	1.218	1.25	1.371	1.264	0.761	2.106	1.388	1.971	0.943	1.263	1.514	1.92
Arachidonic Acid	0.774	0.733	1.524	2.144	1.295	1.595	1.517	2.157	0.51	0.554	0.61	2.073	1.047	2.041	1.04
Arecaidine	1.064	0.899	0.894	0.871	0.989	0.909	1.084	0.518	1.959	2.32	1.15	0.827	0.588	0.892	0.677
Biotin	0.361	3.258	1.463	1.235	0.917	0.468	1.806	0.406	1.455	0.935	0.302	0.28	0.477	0.389	0.791
Bitocholate	0.362	0.51	0.449	1.576	0.815	0.421	1.767	0.425	1.264	1.808	1.118	2.248	1.047	1.184	0.696
Butanoic acid	0.868	1.378	1.041	0.893	0.975	0.994	0.784	1.044	0.989	1.04	1.181	0.664	1.767	0.797	0.978
C20913 - 2 tags	2.478	1.331	0.418	0.301	0.516	0.34	0.51	0.153	0.794	0.544	2.002	0.268	0.411	0.392	0.88
Cannabigerolate	0.721	0.957	1.023	1.557	1.435	1.515	0.901	1.251	0.733	0.827	0.893	1.115	1.259	1.421	1.636
Carbonic acid	0.792	0.799	1.03	0.529	1.394	0.698	0.911	0.357	1.142	0.639	1.033	0.435	0.897	0.694	1.258
Carnosic acid	0.237	0.664	0.972	0.434	5.104	0.803	0.515	1.909	1.531	0.572	0.565	0.527	1.114	1.258	0.84
cis,cis-4-Hydroxymuconic semialdehyde	0.468	0.668	0.971	1.082	1.551	1.379	0.904	1.052	1.214	0.729	0.608	0.831	1.564	0.898	0.93
cis,cis-Muconate - 2 tags	0.594	0.354	0.735	0.452	0.915	0.648	0.59	0.353	0.47	0.336	0.389	0.659	0.731	0.517	0.96
Citronellate	0.995	0.795	1.456	1.3	0.908	1.676	0.948	1.812	0.491	0.607	0.731	3.19	0.896	1.84	0.663
Crepenynate	0.682	0.902	1.173	2.16	1.021	1.294	1.196	1.465	0.748	0.916	0.707	1.731	1.054	1.431	0.716
Crocetin	0.872	1.043	0.994	0.658	0.562	1.264	1.19	1.014	0.605	0.92	1.292	0.828	1.078	0.798	0.702
Dehydroalanine	1.551	1.044	0.777	0.986	0.37	1.071	1.139	0.778	0.914	1.601	1.527	0.894	0.605	1.012	0.724
Delta-12-Prostaglandin J2	0.624	0.757	0.961	0.781	1.714	0.812	1.058	1.142	1.216	0.747	0.705	1.131	1.152	1.082	0.931
Delta1-Piperideine-2-carboxylate	1.069	1.186	1.122	0.954	0.804	0.844	1.158	1.087	0.981	1.16	0.941	1.276	0.939	1.084	1.009
D-Glycerate	1.003	0.639	0.778	0.428	0.819	0.769	0.651	0.371	0.63	0.349	0.975	0.496	0.667	0.849	1.553
D-Lombricine	1.151	1.52	0.847	1.041	0.505	0.736	0.65	0.923	2.075	0.975	1.724	NA	1.487	NA	NA
D-Lysopine - 2 tags	1.059	0.949	0.721	0.833	1.272	0.998	0.863	0.642	1.796	0.672	0.821	0.717	0.864	0.671	1.058
Etherolenic acid	0.74	0.881	1.088	2.058	1.176	1.167	1.227	1.669	0.851	0.807	0.59	1.212	1.127	1.201	0.829
Fumarate/Maleic acid	1.889	0.987	0.615	0.642	1.096	0.534	0.767	0.467	2.094	1.362	1.374	0.375	0.778	0.506	0.587
gamma-L-Glutamyl-L-cysteine - 2 tags	0.696	0.87	0.659	1.168	1.181	0.568	1.13	0.466	1.865	NA	0.716	0.413	1.036	0.55	0.637
Geranic acid	0.718	0.993	1.182	1.263	1.142	1.333	0.893	1.742	1.235	1.281	1.049	2.176	1.107	1.586	1.336
Germacrene A acid	0.708	1.036	0.991	1.285	0.947	1.15	1.082	1.449	0.821	0.952	0.812	1.047	0.941	0.953	1.022
Gibberellin A12 - 2 tags	0.779	1.131	1.146	0.851	1.748	0.759	1.393	1.53	1	1.758	1.368	1.017	1.412	1.625	0.844
Gibberellin A34	1.344	0.997	1.323	1.767	4.278	2.502	1.78	1.041	4.278	1.147	0.814	0.592	1.027	1.319	2.35
Glutathione - 2 tags	0.763	0.588	0.953	3.881	0.713	0.303	0.819	0.429	1.254	0.976	0.574	0.533	1.332	0.323	0.354
Glyoxylate	1.173	0.392	1.832	0.443	2.021	1.454	1.154	0.882	0.277	0.168	0.86	1.57	0.943	2.171	3.287
Hepoxilin A3	0.477	1.136	1.195	1.378	2.997	0.866	1.814	1.555	1.407	0.931	0.954	1.383	1.787	1.228	1.399
Hepoxilin B3	0.397	1.172	0.935	1.035	1.806	0.998	1.043	0.883	1.325	0.871	0.898	1.795	1.211	1.012	1.214
Homomethionine	0.632	0.575	0.246	0.168	NA	NA	0.509	0.106	0.895	0.579	0.601	0.533	0.28	0.265	0.586
Icosadienoic acid	0.972	0.755	2.124	2.067	1.26	1.436	1.851	2.43	0.571	0.616	0.54	1.708	1.122	1.792	0.792
Iminoaspartate	1.732	1.11	0.481	0.553	0.429	0.638	0.676	0.364	0.941	0.998	1.366	0.412	0.55	0.502	0.755
Iminoaspartate - 2 tags	0.656	0.488	0.803	0.852	0.666	1.648	1.066	0.775	0.819	0.769	0.998	0.827	0.736	1.163	0.817
Isomer 1 of (7Z,10Z,13Z,16Z,19Z)-Docosapentaenoic acid	0.751	0.8	1.577	1.526	1.089	1.369	1.636	1.916	0.687	0.712	0.704	1.934	1.184	1.771	0.981
Isomer 1 of (9Z)-Hexadecenoic acid	0.675	0.746	1.044	1.851	0.812	1.482	0.9	1.799	0.517	0.572	0.481	0.92	0.853	0.96	0.662
Isomer 1 of 12-Oxo-9(Z)-dodecenoic acid	0.734	0.904	0.986	1.253	1.255	1.139	0.873	1.358	0.943	1.985	1.241	1.151	1.155	0.812	1.226
Isomer 1 of 13(S)-HODE	0.655	1.131	1.156	1.714	1.256	1.391	1.306	1.439	1.147	1.147	0.751	1.524	1.166	1.302	1.244
Isomer 1 of 16-Hydroxypalmitate	0.632	0.948	1.281	2.891	1.191	1.607	1.274	1.967	0.571	0.719	0.448	1.316	1.268	1.255	0.764
Isomer 1 of 16-Oxopalmitate	0.661	1.046	1.302	3.061	1.374	1.348	1.124	2.017	0.813	0.825	0.516	1.804	1.14	1.708	0.94
Isomer 1 of 1-Aminocyclopropane-1-carboxylate	0.906	1.067	0.714	0.897	1.049	0.893	0.739	0.631	1.138	0.889	1.108	0.747	0.942	0.691	0.85
Isomer 1 of 1-Deoxy-11-oxopentalenate	0.831	1.101	0.905	1.077	1.667	0.759	1.104	1.198	1.361	1.765	1.395	0.965	1.069	1.157	1.102
Isomer 1 of 2-Hydroxybutanoic acid	0.984	1.223	1.019	1.253	1.343	0.936	1.14	0.904	1.207	1.646	0.995	0.95	1.122	1.715	1.344
Isomer 1 of 2-Naphtylmethylsuccinic acid	0.58	0.762	1.026	1.471	1.419	0.893	0.974	1.937	0.876	1.02	0.915	0.354	1.951	0.739	1.409
Isomer 1 of 3-Hydroxyisovalerate	0.646	0.722	0.896	0.956	1.218	0.919	1.03	1.286	1.029	1.017	0.933	0.34	1.135	0.717	1.352
Isomer 1 of 3-Hydroxypropanoate	0.819	0.834	0.791	0.812	0.766	0.827	0.714	0.389	1.968	1.274	1.119	0.586	0.954	0.479	0.539
Isomer 1 of 4-Acetamidobutanoate	0.989	1.466	2.262	3.743	6.549	3.045	2.175	3.246	3.721	1.359	0.941	2.243	3.994	1.727	1.785
Isomer 1 of 4-Methylene-L-glutamate	1.674	1.39	0.544	0.708	0.849	0.54	0.869	0.495	1.016	1.35	1.544	0.975	0.509	0.725	0.674
Isomer 1 of 4-Methylene-L-glutamate - 2 tags	1.089	1.489	0.324	0.43	NA	0.336	0.623	0.273	0.332	1.5	1.409	0.866	0.159	0.603	0.356
Isomer 1 of 6-Aminohexanoate	0.245	0.363	2.092	2.95	5.077	3.038	1.593	3.097	1.884	0.48	0.292	1.924	3.492	1.883	1.427
Isomer 1 of 6beta,7beta-Dihydroxykaurenoic acid	0.163	0.359	1.406	1.176	3.376	1.662	1.515	2.985	2.075	0.463	0.264	1.689	1.736	2.085	1.001
Isomer 1 of 8-Methyl-6-nonenoic acid	0.974	0.911	1.386	1.55	1.036	1.402	0.828	1.863	0.636	0.795	0.901	2.439	1.064	1.553	0.746
Isomer 1 of 9,10,18-Trihydroxystearate	0.825	0.741	1.653	2.381	1.144	1.967	1.37	2.593	0.502	0.507	0.412	1.655	1.232	2.176	0.806
Isomer 1 of 9,10-Dihydroxystearate	NA	1.091	1.532	1.264	1.277	1.403	1.53	1.772	NA	0.982	1.012	2.131	1.206	1.239	1.548
Isomer 1 of Acetate	0.641	0.672	0.767	0.49	0.721	0.677	0.88	0.536	0.787	0.733	0.946	0.396	0.795	0.51	1.087
Isomer 1 of Acrylic acid	0.969	1.109	1.331	1.314	0.876	1.254	1.124	1.542	0.687	1.099	0.891	1.813	1.333	1.298	1.067
Isomer 1 of all-trans-4-Oxoretinoic acid	0.571	0.499	0.73	0.911	0.756	0.859	0.812	0.843	0.573	0.232	0.308	0.54	0.909	0.562	0.496
Isomer 1 of Aminomalonic acid - 2 tags	1.393	0.841	0.676	0.307	0.921	0.984	1.158	0.435	1.928	0.988	1.097	0.368	0.538	0.625	1.056
Isomer 1 of Arachidonic Acid	0.84	0.715	1.597	2.365	1.146	1.584	1.506	2.152	0.514	0.541	0.585	2.182	1.074	1.968	0.934
Isomer 1 of Cannabigerolate	1.09	1.201	0.639	0.947	1.424	0.84	0.716	0.684	1.018	1.354	1.212	1.023	0.942	0.63	1.338
Isomer 1 of D-Glycerate	0.878	0.523	1.105	1.024	2.361	1.083	0.854	0.852	0.693	0.358	0.714	1.229	1.171	1.158	1.846
Isomer 1 of Gibberellin A12 - 2 tags	0.564	1.238	1.202	0.775	1.758	0.536	0.888	2.217	0.92	1.532	1.251	0.632	1.345	2.056	0.811
Isomer 1 of Glutamate - 2 tags/D-Glutamate - 2 tags/L-Glutamate - 2 tags	2.043	1.086	0.643	0.247	0.795	0.452	0.873	0.3	1.615	1.032	2.09	0.179	0.449	0.357	0.785
Isomer 1 of Hexadecanedioate	0.939	0.612	0.652	0.947	0.833	0.917	0.907	0.788	1.142	0.544	0.707	4.12	1.302	2.054	0.804
Isomer 1 of Icosatrienoic acid	0.514	1.764	0.723	0.915	0.787	0.694	1.086	1.153	1.107	0.722	0.646	2.066	0.856	0.849	0.982
Isomer 1 of L-Aspartate/D-Aspartate	0.797	1.112	0.68	0.93	1.908	0.818	0.72	0.543	1.632	1.158	1.007	0.534	0.929	0.612	0.638
Isomer 1 of Leukotriene B4	0.712	1.092	1.002	1.111	2.013	0.871	1.27	1.516	1.85	1.527	1.156	0.851	1.597	0.972	1.429
Isomer 1 of L-Hypoglycin A	0.85	1.194	1.121	1.199	0.846	1.119	1.089	1.264	1.004	0.923	0.929	2.687	0.98	0.937	0.809
Isomer 1 of Linatine - 2 tags	3.199	1.702	0.725	0.359	0.806	0.776	1.13	0.473	1.371	1.413	2.139	0.451	0.561	0.727	1.287
Isomer 1 of Linoleate	0.677	0.644	1.329	2.311	1.107	1.362	0.909	3.197	0.584	0.692	0.456	1.6	1.095	2.334	1.06
Isomer 1 of L-Phenylalanine/D-Phenylalanine	0.429	0.442	1.522	2.025	3.278	2.282	1.109	2.053	1.119	0.594	0.452	1.567	2.103	1.615	1.409
Isomer 1 of L-Pipecolate	0.859	1.059	0.831	0.766	1.219	1.25	0.928	NA	1.079	0.888	0.95	1.173	0.986	0.947	1.136
Isomer 1 of L-Proline/D-Proline	0.847	1.198	0.976	1.266	0.949	1.19	1.018	1.187	1.271	1.256	1.092	1.024	1.254	1.103	0.991
Isomer 1 of L-threo-3-Methylaspartate - 2 tags	1.236	0.806	0.707	0.379	0.614	1.208	1.008	0.532	1.413	1.179	0.978	0.481	0.529	0.646	0.911
Isomer 1 of N-Formyl-L-aspartate	0.968	0.59	0.62	0.577	0.738	0.761	0.635	0.342	0.706	0.356	0.972	0.468	0.628	0.679	1.061
Isomer 1 of N-Hydroxy-L-phenylalanine	0.764	0.825	0.689	0.843	1.22	2.074	0.991	1.556	1.392	1.155	0.791	0.473	0.839	0.837	1.556
Isomer 1 of Phenylacetylglycine	0.666	0.777	1.084	1.184	1.403	1.311	0.994	1.542	1.123	0.88	0.726	1.224	1.457	1.159	1.221
Isomer 1 of p-Hydroxyphenylacetylglycine	0.67	1.082	0.652	0.75	0.908	0.827	0.856	0.86	1.415	0.816	0.714	1.547	0.946	1.132	1.743
Isomer 1 of Retinoate/9-cis-Retinoic acid	0.617	0.677	1.7	2.273	1.124	1.866	1.304	2.667	0.363	0.555	0.428	1.972	1.05	2.715	0.887
Isomer 1 of Stearidonic acid	0.681	0.781	1.182	1.332	1.073	1.332	1.275	1.835	0.557	0.759	0.598	1.547	0.875	2.161	0.931
Isomer 1 of Tetradecanoic acid	0.851	0.772	1.244	1.946	1.122	1.728	1.209	2.682	0.433	0.507	0.614	1.961	1.081	2.004	0.658
Isomer 1 of Traumatic acid - 2 tags	1.097	0.98	1.002	0.849	0.499	0.767	1.026	0.939	0.533	1.876	1.339	1.653	0.726	1.072	1.057
Isomer 2 of (9Z)-Hexadecenoic acid	0.792	0.694	1.677	2.712	1.09	1.736	1.355	3.004	0.38	0.569	0.482	2.07	1.176	2.492	0.754
Isomer 2 of (S)-Lactate/(R)-Lactate	0.832	0.827	0.787	0.823	0.755	0.834	0.695	0.385	2.031	1.296	1.133	0.574	0.965	0.465	0.499
Isomer 2 of 16-Hydroxypalmitate	0.775	0.891	1.506	3.986	1.136	1.803	1.455	2.334	0.672	0.709	0.345	2.836	1.375	1.838	0.883
Isomer 2 of 16-Oxopalmitate	1.101	0.788	0.934	1.181	1.039	1.733	1.201	1.282	0.643	0.684	0.694	1.515	0.887	1.288	0.695
Isomer 2 of 1-Deoxy-11-oxopentalenate	0.614	1.421	0.961	1.49	1.403	0.886	1.171	1.194	1.025	0.813	0.868	1.288	1.325	0.82	0.93
Isomer 2 of 3-Hydroxyisovalerate	0.712	0.812	0.917	0.929	1.173	0.916	1.023	1.245	1.086	1.055	0.923	0.447	1.158	0.733	1.303
Isomer 2 of 5-Aminopentanoate	0.496	0.627	1.648	2.335	4.552	2.311	1.307	2.06	1.72	0.973	0.623	1.791	2.441	1.985	1.43
Isomer 2 of 6beta,7beta-Dihydroxykaurenoic acid	0.715	0.669	0.809	0.893	2.582	1.365	1.392	3.287	1.976	0.864	0.651	1.715	1.75	1.63	0.785
Isomer 2 of 9,10-Dihydroxystearate	0.623	1.223	1.382	1.797	0.892	1.704	1.395	1.859	0.731	1.19	0.889	2.082	1.272	1.748	0.64
Isomer 2 of D-Glycerate	0.828	0.398	1.262	0.415	2.729	0.828	0.94	0.481	0.62	0.311	0.65	0.725	1.051	1.208	2.393
Isomer 2 of Hexadecanedioate	0.27	0.434	0.191	0.738	0.435	0.392	0.394	0.696	0.317	0.418	0.665	0.843	0.831	0.818	0.312
Isomer 2 of L-Aspartate/D-Aspartate	0.842	0.897	0.594	0.954	0.971	0.977	0.839	0.547	1.487	1.044	0.791	0.67	0.962	0.757	1.064
Isomer 2 of L-Hypoglycin A	0.91	1.202	1.112	0.796	0.876	0.802	1.055	0.866	0.79	1.559	1.081	1.205	0.827	1.08	1.222
Isomer 2 of L-Phenylalanine/D-Phenylalanine	0.574	0.652	1.525	1.999	3.222	2.248	1.225	1.949	1.291	0.661	0.638	1.58	2.124	1.612	1.563
Isomer 2 of Retinoate/9-cis-Retinoic acid	0.811	0.604	1.413	1.382	1.22	1.549	1.195	1.611	0.584	0.637	0.422	2.802	1.02	1.606	0.779
Isomer 2 of Stearidonic acid	0.726	0.823	1.217	1.22	1.062	1.222	1.529	1.783	0.588	0.679	0.579	1.495	0.826	1.686	0.763
Isomer 3 of (9Z)-Hexadecenoic acid	0.776	0.674	1.659	1.994	1.06	1.539	1.308	2.42	0.391	0.539	0.483	1.733	1.037	1.871	0.695
Isomer 3 of (S)-Lactate/(R)-Lactate	0.813	0.825	0.79	0.806	0.783	0.832	0.732	0.397	1.934	1.249	1.093	0.593	0.951	0.488	0.554
Isomer 3 of 6beta,7beta-Dihydroxykaurenoic acid	0.646	0.779	1.037	2.236	1.713	1.247	1.214	2.801	1.817	0.968	0.704	1.539	1.937	1.317	0.697
Isomer 3 of 9,10-Dihydroxystearate	0.999	1.132	1.605	1.978	1.105	1.94	1.339	1.907	0.536	0.78	1.131	2.087	1.607	1.474	1.103
Isomer 4 of (9Z)-Hexadecenoic acid	0.74	0.663	1.446	1.392	0.993	1.38	1.169	2.317	0.372	0.549	0.422	1.534	0.904	1.681	0.748
Isomer 4 of 6beta,7beta-Dihydroxykaurenoic acid	0.531	0.84	0.754	1.021	0.953	1.015	1.038	1.056	0.829	0.839	0.76	0.93	0.858	0.929	0.681
L-1-Pyrroline-3-hydroxy-5-carboxylate	0.526	0.776	0.695	0.919	1.419	0.89	1.064	0.628	1.991	0.938	1.002	0.553	1.038	0.738	1.024
L-2-Aminoadipate 6-semialdehyde/Allysine	0.607	0.482	0.942	1.213	1.846	1.384	0.738	0.929	0.773	0.494	0.617	0.826	1.442	1.492	1.417
L-Alanine/D-Alanine	0.527	0.735	0.983	1.652	2.203	1.364	0.967	1.111	1.46	0.916	0.655	0.743	1.71	0.908	0.971
L-Arginine/D-Arginine	1.482	1.652	0.639	0.755	0.597	0.718	0.87	0.634	1.369	1.689	1.367	0.705	0.689	0.662	0.672
L-Aspartate - 2 tags/D-Aspartate - 2 tags	1.197	0.904	0.549	0.606	0.378	0.702	0.531	0.48	0.771	0.735	1.584	0.587	0.513	0.666	0.634
L-Aspartate/D-Aspartate	0.906	0.715	0.539	0.581	0.935	0.623	0.613	0.282	1.081	0.548	0.893	0.364	0.644	0.568	0.838
Leukotriene A4	0.518	0.998	1.292	0.962	1.545	1.049	1.067	1.113	0.958	0.741	0.711	1.372	1.205	1.34	1.042
Leukotriene B4	0.658	1.124	1.341	1.426	2.268	0.824	1.012	1.254	1.208	1.039	0.869	1.119	1.545	1.245	1.192
Leukotriene C4 - 2 tags	1.277	1.239	0.424	0.34	0.18	0.203	0.512	0.316	0.441	1.136	0.998	0.508	0.362	0.379	0.411
L-Hypoglycin A	1.119	1.421	1.15	1.024	0.702	1.098	1.187	1.09	0.993	1.344	1.119	1.33	0.874	1.193	0.98
Linatine - 2 tags	1.971	1.925	0.639	0.763	0.6	0.715	1.008	0.413	1.493	1.935	2.535	0.485	0.609	0.594	0.738
Linoleate	0.796	0.716	1.849	2.794	1.014	1.819	1.444	2.832	0.368	0.568	0.531	2.242	1.079	2.527	0.792
Lipoxin B4	0.627	1.036	1.199	1.046	2.069	0.798	0.999	1.032	1.432	1.128	0.793	0.933	1.405	1.096	1.315
LL-2,6-Diaminoheptanedioate - 2 tags/meso-2,6-Diaminoheptanedioate - 2 tags	0.848	0.724	0.86	0.577	0.851	0.784	0.886	0.404	0.926	0.911	1.021	0.858	0.702	0.843	1.31
L-Methionine	0.745	1.036	0.978	1.337	1.037	1.092	1.101	1.083	1.044	1.067	0.89	1.214	1.228	0.995	0.97
L-Norleucine	0.936	0.813	1.123	1.121	1.447	1.463	1.054	1.191	1.558	1.469	0.893	1.165	1.131	1.101	1.046
Loganate	1.165	1.109	1.076	0.886	1.402	1.104	1.095	0.961	1.054	1.06	1.078	0.838	1.059	1.021	1.215
L-Phenylalanine/D-Phenylalanine	0.429	0.442	1.522	2.002	3.267	2.282	1.109	2.05	1.119	0.594	0.452	1.567	2.103	1.615	1.409
L-Proline/D-Proline	0.844	1.187	0.876	1.275	0.876	1.179	0.981	1.16	1.403	1.261	1.067	1	1.13	0.923	0.841
L-threo-3-Methylaspartate - 2 tags	0.584	0.768	0.324	0.221	0.597	0.315	0.731	0.456	1.329	0.792	0.942	0.314	0.398	0.415	0.517
L-threo-3-Methylmalate/D-erythro-3-Methylmalate/D-threo-3-Methylmalate	0.677	0.721	0.79	0.653	1.065	0.986	0.823	0.633	0.832	0.727	0.827	0.656	0.907	0.64	1.117
L-Threonine/L-Allothreonine	0.55	0.896	0.69	0.947	1.101	0.846	0.883	0.66	1.241	0.786	0.515	0.952	1.037	0.945	1.175
L-Tyrosine	0.412	0.501	1.422	1.84	3.213	1.923	1.195	2.365	1.447	0.601	0.473	1.417	2.646	1.367	1.506
L-Valine	0.647	0.797	1.07	1.435	1.576	1.32	0.893	1.436	1.052	0.854	0.615	1.684	1.557	1.192	1.123
Malonate	1.133	0.733	2.068	0.55	3.371	1.052	1.33	0.528	0.974	0.458	1.092	0.85	1.143	1.376	3.056
Malonate - 2 tags	3.803	4.067	5.042	7.542	2.299	5.217	2.933	1.516	3.194	8.162	6.622	5.579	5.319	3.767	1.818
Methylmalonate	0.664	0.572	0.748	0.666	0.282	0.661	0.463	0.209	0.661	0.834	1.029	0.515	0.573	0.45	0.311
m-Methylbenzoate	1.595	1.592	1.366	1.153	1.021	1.284	1.249	1.219	1.081	1.345	1.378	1.172	0.98	1.035	1.283
Monacolin L acid	0.644	1.017	1.094	1.167	2.392	0.746	0.962	1.222	1.235	1.559	1.15	0.867	1.334	1.413	1.059
N,N-Dihydroxy-L-isoleucine	1.109	1.102	0.719	0.665	1.519	0.767	0.761	0.543	1.468	0.949	1.112	0.522	0.786	0.61	0.922
N,N-Dihydroxy-L-valine	1.319	0.958	1.263	0.996	2.484	1.195	0.926	1.025	NA	0.712	1.386	1.064	1.103	1.295	1.992
N-Acetyl-beta-alanine	0.72	1.177	1.717	3.337	4.668	2.032	1.712	2.107	3.112	1.433	0.733	1.806	2.987	1.531	1.703
N-Formyl-L-aspartate	0.957	0.585	0.614	0.567	0.747	0.768	0.636	0.347	0.704	0.358	0.976	0.466	0.623	0.688	1.063
N-Formyl-L-aspartate - 2 tags	1.867	0.914	0.498	0.32	0.177	0.443	0.433	0.196	0.342	0.488	1.483	0.339	0.286	0.598	0.68
N-Hydroxy-L-phenylalanine	0.627	0.807	1.185	1.285	1.289	1.361	1.127	1.73	1.294	0.972	0.774	1.341	1.514	1.164	1.335
Nicotinurate	1.124	0.641	0.627	0.419	0.646	0.681	0.582	0.295	0.703	0.506	0.992	0.486	0.562	0.951	1.999
Octadec-9-ene-1,18-dioic-acid - 2 tags	0.778	0.95	1.195	1.107	0.705	1.055	1.616	1.702	0.641	1.375	1.002	3.788	1.3	1.642	0.747
Pentalenate	0.738	1.013	0.797	1.507	1.622	0.689	1.211	1.262	1.111	1.372	1.03	0.764	1.303	1.044	0.985
Prostaglandin B2	NA	0.629	0.594	0.569	0.805	0.592	0.868	0.613	0.689	0.54	0.477	0.481	0.537	0.489	0.533
Prostaglandin C2	0.543	1.074	1.172	1.128	2.202	0.766	1.059	1.195	1.205	1.143	0.767	1.082	1.293	0.965	1.147
Prostaglandin J2	0.679	0.595	0.634	0.397	0.926	0.683	1.028	0.997	1.445	0.636	0.672	0.929	0.848	0.985	0.787
Quinolinate - 2 tags	0.702	0.576	1.228	1.38	1.328	1.532	0.903	0.977	0.872	0.727	0.743	0.702	1.29	0.903	1.08
S-(Indolylmethylthiohydroximoyl)-L-cysteine	0.462	0.478	0.448	0.499	0.392	0.459	0.34	0.229	1.155	0.845	0.697	0.298	0.566	0.242	NA
S-Glutathionyl-L-cysteine - 2 tags	4.439	2.697	3.296	1.37	3.473	2.436	2.832	1.889	1.793	1.568	3.502	2.456	2.465	3.304	4.294
Stearidonic acid	0.578	0.696	0.753	1.473	1.237	1.109	1.165	1.162	0.802	0.843	0.476	1.112	1.063	0.968	0.946
Succinate semialdehyde	0.746	0.499	1.3	0.591	2.319	1.497	1.085	0.893	0.594	0.427	0.717	1.217	1.298	1.459	1.693
syn-Stemoden-19-oate	0.812	0.678	1.402	1.61	0.981	1.489	1.21	1.8	0.605	0.626	0.57	1.643	0.918	1.569	0.748
Traumatin	0.821	0.739	0.979	0.416	0.596	0.346	0.504	0.835	0.58	0.963	1.705	0.394	0.594	1.085	0.954
3-Aminoisobutanoic Acid - Isomer	0.508	0.499	1.462	1.192	3.363	1.602	1.045	1.549	2.306	0.697	0.615	1.11	2.647	1.846	1.773
2-Aminobenzoic Acid (2 tags 1 charge)	0.725	0.71	0.578	0.55	0.923	0.864	0.715	1.249	0.445	0.56	0.757	0.557	0.584	0.543	0.766
2-Hydroxy-2-methylbutyric Acid	0.83	0.744	0.912	0.955	1.346	0.971	1.089	1.121	1.262	0.89	0.989	0.873	1.049	0.97	1.575
2-Hydroxybutyric Acid	1.115	1.155	1.109	0.995	1.025	0.832	0.953	0.841	1.149	1.42	1.09	0.656	1.338	0.846	0.997
2-Ketohexanoic Acid	0.85	1.08	0.914	1.075	0.909	1.016	0.936	1.07	0.867	0.783	0.722	1.084	0.964	0.839	0.814
3-Hydroxybutyric Acid	0.657	0.961	0.862	0.796	1.006	0.945	1.194	0.99	0.926	1.205	0.978	0.47	0.996	0.833	1.322
3-Hydroxyisovaleric Acid	0.779	1.227	1.005	0.747	1.273	1.013	0.914	0.935	1.266	1.065	0.914	0.974	0.935	0.801	1.24
4-Ethylbenzoic Acid	0.786	0.774	0.983	0.468	0.48	0.506	0.698	0.891	0.827	1.241	2.002	0.596	0.673	0.937	1.043
4-Methyl-2-oxopentanoic Acid / 2-Methyl-3-ketovaleric Acid / 3-methyl-2-oxo-Valeric Acid	0.85	1.08	0.914	1.101	0.909	0.97	0.872	1.035	0.84	0.969	0.779	1.03	1.13	0.759	0.814
5-Aminopentanoic Acid (2 tags 1 charge)	1.427	0.82	0.871	0.72	1.08	0.938	1.101	0.598	1.651	1.363	1.208	0.903	0.66	1.584	1.372
7-Ketodeoxycholic Acid	1.087	0.253	1.436	0.615	1.053	0.83	1.07	1.2	1.8	0.928	0.908	1.346	1.475	2.606	0.51
7-Ketolithocholic Acid	1.037	0.421	1.829	0.966	1.457	0.861	0.861	0.823	1.943	0.784	1.442	0.74	1.425	1.767	0.779
Acetic Acid	0.797	0.827	1.002	0.64	1.016	0.838	1.135	0.765	1.067	1.028	1.35	0.455	1.054	0.614	1.485
Aminolevulinic Acid (2 tags 1 charge)	1.365	1.242	0.728	1.174	0.68	0.809	1.207	0.747	1.462	1.325	1.528	0.694	0.894	1.08	0.83
Aspartate	0.782	0.706	0.524	0.617	1.023	0.702	0.587	0.358	1.126	0.573	0.786	0.419	0.675	0.54	0.786
Aspartate (2 tags 1 charge) - Isomer	1.869	1.273	0.431	0.382	0.588	0.535	0.661	NA	1.06	0.751	1.487	0.296	0.445	0.483	0.749
Azelaic Acid (2 tags 2 charges)	1.414	1.253	0.695	0.663	0.395	0.552	0.8	0.786	0.645	1.661	2.587	0.902	0.667	0.677	1.365
Carnitine	0.944	1.043	0.772	0.947	1.377	1.13	0.709	0.778	1.384	0.862	0.731	1.059	1.291	0.958	0.981
Chenodeoxycholic Acid	0.332	0.341	0.536	1.993	0.675	0.39	1.889	0.339	1.021	3.088	0.918	2.565	0.992	1.43	0.416
Cholic Acid	0.279	0.521	0.477	1.727	0.792	0.394	2.05	0.344	1.226	2.019	1.093	2.53	1.01	1.359	0.627
Citric Acid / Isocitric Acid	1.082	0.786	0.657	0.754	1.507	0.499	0.851	0.525	1.669	0.635	0.849	0.346	0.758	0.529	0.876
Citric Acid / Isocitric Acid - Isomer	1.079	0.808	0.669	0.761	1.521	0.493	0.858	0.536	1.705	0.63	0.867	0.343	0.765	0.528	0.896
Deoxycholic Acid	0.491	0.345	0.933	2.733	0.671	0.262	1.962	0.531	0.556	2.848	0.566	2.737	1.462	1.509	0.438
Dimethylmalonic Acid / Ethylmalonic Acid	0.936	2.04	0.762	0.891	1.401	0.734	1.191	0.598	1.777	0.928	1.484	0.539	0.858	0.766	1.654
Dimethylmalonic Acid / Ethylmalonic Acid (2 tags 2 charges)	1.444	2.737	0.693	0.664	0.353	0.61	1.018	0.536	0.718	1.057	1.878	0.295	0.579	0.538	1.16
Dodecanedioic Acid	0.312	0.575	1.035	1.22	1.709	1.14	1.324	1.404	1.573	1.167	0.622	1.136	1.479	0.912	1.163
Dodecanedioic Acid (2 tags 2 charges)	0.768	0.868	0.893	0.919	0.464	0.733	1.055	0.955	0.659	1.504	1.248	3.401	0.832	1.041	0.999
e-Aminocaproic Acid (2 tags 2 charges)	0.72	0.517	1.018	0.64	0.994	1.769	0.945	0.78	1.697	2.122	0.717	1.057	0.398	0.721	0.398
gamma-Aminobutyric Acid (2 tags 1 charge)	0.881	0.855	0.909	0.941	1.636	1.007	1.012	0.81	1.037	0.695	0.804	0.967	1.147	1.184	1.233
Glutamic Acid (2 tags 1 charge)	2.317	1.369	0.517	0.378	0.549	0.584	0.91	0.378	1.329	1.086	2.725	0.353	0.555	0.433	0.81
Glutaric Acid	1.521	1.415	1.016	1.33	2.269	0.962	1.385	0.647	2.22	1.157	1.419	0.923	1.191	0.941	1.515
Glycochenodeoxycholic Acid	0.683	0.575	0.366	0.463	0.736	0.347	0.749	1.23	1.189	0.638	2.231	1.052	2.035	0.442	0.339
Glycocholic Acid	0.729	0.703	0.252	0.636	0.807	0.334	0.696	0.825	1.459	0.418	2.002	0.889	2.045	0.396	0.472
Glycodeoxycholic Acid	0.84	0.495	0.387	0.717	0.707	0.177	0.79	1.192	0.592	0.714	1.41	1.108	2.515	0.498	0.343
Glycolate	0.98	0.582	0.697	0.422	0.719	0.762	0.581	0.371	0.561	0.397	0.981	0.596	0.62	0.81	1.389
Glycolithocholic Acid	0.371	0.85	0.549	0.523	0.668	0.299	0.679	1.067	0.693	1.153	2.072	2.425	2.201	0.328	0.495
Hexadecanedioic Acid	0.253	0.672	0.908	1.3	1.838	1.484	1.306	1.498	1.25	0.858	0.681	2.472	1.381	2.189	1.233
Hexadecanedioic Acid (2 tags 2 charges)	0.674	0.731	0.889	0.898	0.614	1.046	1.565	1.448	0.573	1.119	0.934	5.579	1.002	1.979	0.849
Hippuric Acid	0.834	0.851	0.725	1.093	1.049	1.01	1.093	1.081	1.228	1.298	0.943	1.077	0.825	0.862	1.19
Hydracrylic Acid	0.794	0.815	0.788	0.765	0.825	0.824	0.714	0.402	1.892	1.075	1.013	0.563	0.943	0.475	0.629
Hydrocinnamic Acid / 3-Methylphenylacetic Acid	0.525	0.81	1.324	1.278	0.883	0.547	0.893	1.068	1.252	1.252	1.253	0.748	1.349	0.874	1.187
Hydroxyindoleacetic Acid	8.138	5.513	6.191	5.498	1.636	6.22	6.083	3.495	3.411	2.937	4.154	5.579	6.139	6.453	7.579
Hydroxyoctanoic Acid	0.878	0.873	1.028	1.103	0.981	1.039	0.947	1.751	0.857	1.317	0.916	1.884	1.165	1.501	0.742
Hydroxyphenyllactic Acid	1.107	0.96	0.963	0.977	1.125	1.082	0.891	1.056	0.976	0.925	1.029	1.102	1.259	0.998	0.869
Indoleacetic Acid	0.848	1.23	1.047	1.214	1.397	0.814	1.1	1.246	0.773	0.915	0.988	0.707	1.547	0.631	1.012
Indolelactate	0.881	0.792	0.946	1.383	1.418	1.132	0.842	1.283	0.878	1.219	1.006	1.278	1.235	1.091	0.804
Isoleucine - Isomer	0.362	0.408	1.829	2.383	4.022	2.465	1.401	2.437	1.523	0.476	0.366	1.818	2.9	1.793	1.534
Isoleucine (2 tags 1 charge)	0.846	0.966	1.531	1.493	1.294	1.64	1.264	2.072	0.84	0.915	0.787	2.021	1.527	1.399	1.168
Isoleucine (2 tags 2 charges)	0.766	0.854	1.339	1.328	1.145	1.478	1.095	1.787	0.8	0.844	0.705	1.725	1.342	1.222	1.043
Isomer 1 of 4-Ethylbenzoic Acid	0.714	0.965	1.102	1.012	0.891	0.977	0.863	1.23	0.907	1.185	1.419	1.009	0.98	0.902	0.962
Isomer 1 of 5-Aminopentanoic Acid (2 tags 1 charge)	1.001	0.769	0.967	0.601	1.721	1.106	0.96	0.705	2.278	0.951	0.904	0.629	0.853	1.272	1.222
Isomer 1 of Carnitine	1.002	1.177	0.526	0.723	0.833	0.778	0.553	0.595	1.283	0.953	0.743	0.996	0.974	0.727	0.803
Isomer 1 of Hydroxyindoleacetic Acid	8.125	6.002	5.573	4.908	1.559	1.359	5.417	2.29	3.335	2.956	2.228	5.234	3.63	5.841	8.503
Isomer 1 of Hydroxyphenyllactic Acid	1.211	0.946	1.051	0.86	1.92	0.802	0.852	0.944	0.93	0.806	1.054	0.939	1.42	1.074	1.16
Isomer 1 of Lactic Acid	0.867	0.896	0.87	0.936	0.741	0.891	0.626	0.405	2.218	1.589	1.312	0.605	1.068	0.44	0.35
Isomer 1 of Oleic Acid / Vaccenic Acid	0.902	0.672	1.975	2.536	1.025	1.964	1.485	3.091	0.365	0.469	0.452	1.921	1.24	2.594	0.751
Isomer 1 of Pentadecylic Acid	0.781	0.625	1.568	2.057	1.087	1.989	1.427	2.612	0.468	0.647	0.585	2.209	1.182	2.372	0.769
Isomer 1 of Sebacic Acid (2 tags 2 charges)	1.062	1.005	0.802	0.773	0.545	0.581	0.885	0.884	0.546	1.556	1.631	0.868	0.794	0.766	1.228
Isomer 2 of Oleic Acid / Vaccenic Acid	0.897	0.67	1.993	2.478	1.015	1.983	1.679	2.899	0.388	0.498	0.414	2.645	1.134	2.44	0.706
Lactic Acid	0.871	0.912	0.801	0.88	0.88	0.865	0.71	0.403	2.108	1.3	1.198	0.587	1.01	0.435	0.534
Lauric Acid	0.696	0.664	1.227	1.699	1.02	1.816	1.39	2.947	0.42	0.548	0.579	2.377	1.007	2.374	0.665
Lithocholic Acid	0.459	0.894	1.224	2.34	0.541	0.437	1.432	0.906	0.968	3.397	0.976	2.023	1.64	1.355	0.925
Malic Acid	0.822	0.553	0.595	0.714	1.326	0.748	0.596	0.437	1.203	0.587	0.795	0.446	0.884	0.614	0.88
Mesaconic Acid	0.897	1.532	0.591	0.408	0.989	0.838	1.271	NA	1.149	2.357	2.326	0.732	0.584	0.836	0.737
Methionine sulfoxide (2 tags 1 charge)	1.042	0.753	0.648	0.785	0.908	0.69	0.825	0.587	0.991	0.897	0.832	0.717	0.873	0.927	1.032
Methionine sulfoxide (2 tags 2 charges)	0.982	1	0.847	0.924	0.932	0.994	1.014	0.799	1.277	1.063	1.004	0.904	1.217	1.012	1.184
Myristic Acid	0.815	0.604	1.424	2.227	1.015	1.806	1.215	3.093	0.37	0.463	0.54	2.087	1.153	2.378	0.624
N-[2-(4-Hydroxyphenyl)acetyl]glycine	1.256	1.094	0.801	0.77	1.402	0.807	1.119	0.682	1.111	0.841	1.05	0.878	0.9	0.833	1.498
N-Acetyl-phenylalanine	1.309	1.45	1.417	1.191	2.026	1.683	1.547	1.564	1.004	0.95	0.899	1.101	0.986	1.182	2.159
N-isovaleroylglycine	0.755	0.918	1.087	1.181	1.49	1.744	1.07	1.464	1.21	1.017	0.786	1.099	1.103	1.17	1.486
Norcholic Acid	0.338	0.767	0.75	1.841	0.773	0.927	1.488	0.747	1.491	0.648	1.018	1.892	0.902	1.459	0.898
Nordeoxycholic Acid	0.704	0.626	0.707	1.782	1.581	0.625	1.544	1.065	0.935	1.444	0.953	1.885	1.612	2.004	0.868
Octadecanedioic Acid	0.53	0.577	1.281	1.748	1.398	1.872	1.258	2.073	0.96	0.658	0.407	2.117	1.58	2.004	1.114
Oleic Acid / Vaccenic Acid	0.9	0.668	1.974	2.51	1.025	1.956	1.581	2.99	0.378	0.482	0.424	2.384	1.195	2.515	0.72
Pentadecylic Acid	0.766	0.617	1.449	1.859	1	1.903	1.286	2.464	0.452	0.593	0.537	2.07	0.985	2.353	0.737
Phenylacetylglycine	0.842	1.111	1.047	1.39	1.378	1.207	0.971	1.827	0.733	0.816	0.984	0.205	1.348	0.438	0.846
Pipecollinic Acid - Isomer	0.373	0.751	1.158	1.601	NA	1.062	1.119	1.085	1.659	1.081	0.541	2.929	1.332	1.083	1.05
Pipecollinic Acid (2 tags 1 charge)	0.804	1.226	1.081	1.248	0.833	1.084	1.147	1.353	0.981	1.03	0.881	3.212	0.931	1.012	0.822
Pipecollinic Acid (2 tags 2 charges)	0.656	1.09	1.041	1.104	0.972	1.065	1.028	1.245	0.932	0.878	0.883	3.059	0.881	0.924	0.792
Pyroglutamic Acid	0.866	0.902	0.591	0.769	0.903	0.99	0.813	0.708	1.552	0.975	1.221	0.635	0.789	0.62	0.833
Retinoic Acid	0.719	0.722	0.506	0.889	0.846	1.162	1.311	2.587	0.472	0.414	0.418	0.965	0.398	1.344	0.71
Sebacic Acid	0.574	NA	0.64	0.763	1.572	1.07	0.903	0.814	1.88	NA	NA	0.706	0.995	0.621	1.352
Sebacic Acid (2 tags 2 charges)	0.993	1.01	0.799	0.745	0.555	0.6	0.898	0.96	0.601	1.644	1.536	1.781	0.806	0.988	1.261
Serine (2 tags 1 charge)	1.535	1.008	0.684	0.591	0.56	1.091	0.957	0.615	1.317	1.251	1.242	0.603	0.516	0.705	0.887
Shikimic Acid	0.89	0.643	1.213	0.772	2.236	1.191	1.135	0.791	0.855	0.5	0.826	1.066	1.39	1.27	2.069
Succinic Acid	1.842	0.921	0.812	0.614	1.74	0.721	0.983	0.578	1.817	0.933	1.464	0.428	0.795	0.558	0.887
Symmetric dimethylarginine	0.779	0.803	0.852	0.956	1.014	0.992	1.106	0.792	1.134	0.853	0.824	0.87	0.932	1.005	0.983
Traumatic Acid	0.823	0.857	0.709	0.741	0.994	0.923	0.95	0.939	1.155	1.043	0.842	2	0.86	1.003	1.136
Traumatic Acid (2 tags 2 charges)	1.073	1.09	0.93	0.858	0.538	0.769	0.994	0.952	0.542	2.053	1.484	1.752	0.789	0.958	0.97
Undecanedioic Acid (2 tags 2 charges)	1.058	1.068	0.876	0.839	0.492	0.854	1.153	0.975	0.731	1.445	1.551	1.72	0.843	1.126	1.329
Ursodeoxycholic Acid	0.664	0.486	0.876	0.951	0.937	0.688	1.786	0.643	2.236	2.791	1.024	2.029	1.258	2.185	0.515
Valeric Acid	0.861	1.318	1.321	1.051	1.18	0.935	0.882	1.209	0.838	0.834	0.975	0.932	1.808	0.997	1.083
